# Supplementary material for: Leveraging Important Covariate Groups for Corn Yield Prediction
Source: MDPI journal article supplement (doi:10.3390/agriculture13030618), 2023-03-03

---

## Supplementary Information: Leveraging important covariate groups for corn yield prediction

### Data Repository & Reproducibility Statement

We have made all raw data collected for this project from the USDA-NASS, DayMet group, MirRAD project, USDA CDL, and HWSD available at our GitHub page, <https://github.com/blschum/corn-yield-infill/data/data-raw>. In addition, all scripts used to select variables (`variable-selection.Rmd/.html`), impute data (`linear-interpolation.Rmd/.html`), tune RFs (`tune-ranger-models.Rmd`), build RFs (`cornyield-manuscript-analysis.Rmd`), and visualize our results (`cornyield-manuscript-visualizations.Rmd`, `cornyield-SI-visualizations.Rmd`), can be found at the bean-collaboration branch of our GitHub repository (<https://github.com/blschum/corn-yield-infill/>). Finally, we have made our infilled corn yield data product from 2008-2018, available at <https://github.com/blschum/corn-yield-infill/results/ranger-results>.

We believe in open data science and in making research more reproducible; if you run into issues in any of our code, please reach out to blschum on GitHub to address them.

We hope these clean datasets will be used in future research to further elucidate links between crop yields and future cropscares.

**Table S1.** Full list of available historical biophysical predictors. From this full list, we select only the nine climatic features most predictive of corn yield and intrinsic soil properties likely to remain stable through time, as described in the manuscript.

| Variable Name               | Description                                                                                                                                                                                                                                                                                                                                           |
|-----------------------------|-------------------------------------------------------------------------------------------------------------------------------------------------------------------------------------------------------------------------------------------------------------------------------------------------------------------------------------------------------|
| <b>Climate</b>              |                                                                                                                                                                                                                                                                                                                                                       |
| Growing degree days         | GDD: an indicator of cumulative temperature exposure; the sum of maximum daily temperatures within a crop-specific tolerance range (10°C to 30°C for corn) over the growing season                                                                                                                                                                    |
| Total precipitation         | TP: sum of precipitation (in millimeters) throughout the growing season                                                                                                                                                                                                                                                                               |
| Mean annual temp.           | bio1 = Mean annual temperature                                                                                                                                                                                                                                                                                                                        |
| Mean diurnal range          | bio2 = Mean diurnal range (mean of max temp - min temp)                                                                                                                                                                                                                                                                                               |
| Isothermality               | bio3 = Isothermality (bio2/bio7) (* 100)                                                                                                                                                                                                                                                                                                              |
| Temp. seasonality           | bio4 = Temperature seasonality (standard deviation *100)                                                                                                                                                                                                                                                                                              |
| Max warm temp.              | bio5 = Max temperature of warmest month                                                                                                                                                                                                                                                                                                               |
| Min cold temp.              | bio6 = Min temperature of coldest month                                                                                                                                                                                                                                                                                                               |
| Temp. range                 | bio7 = Temperature annual range (bio5-bio6)                                                                                                                                                                                                                                                                                                           |
| Mean wet temp.              | bio8 = Mean temperature of the wettest quarter                                                                                                                                                                                                                                                                                                        |
| Mean dry temp.              | bio9 = Mean temperature of driest quarter                                                                                                                                                                                                                                                                                                             |
| Mean warm temp.             | bio10 = Mean temperature of warmest quarter                                                                                                                                                                                                                                                                                                           |
| Mean cold temp.             | bio11 = Mean temperature of coldest quarter                                                                                                                                                                                                                                                                                                           |
| Total precip.               | bio12 = Total (annual) precipitation                                                                                                                                                                                                                                                                                                                  |
| Precip. wet month           | bio13 = Precipitation of wettest month                                                                                                                                                                                                                                                                                                                |
| Precip. dry month           | bio14 = Precipitation of driest month                                                                                                                                                                                                                                                                                                                 |
| Precip. seasonality         | bio15 = Precipitation seasonality (coefficient of variation)                                                                                                                                                                                                                                                                                          |
| Precip. wet quarter         | bio16 = Precipitation of wettest quarter                                                                                                                                                                                                                                                                                                              |
| Precip. dry quarter         | bio17 = Precipitation of driest quarter                                                                                                                                                                                                                                                                                                               |
| Precip. warm quarter        | bio18 = Precipitation of warmest quarter                                                                                                                                                                                                                                                                                                              |
| Precip. cold quarter        | bio19 = Precipitation of coldest quarter                                                                                                                                                                                                                                                                                                              |
| <b>Soil characteristics</b> |                                                                                                                                                                                                                                                                                                                                                       |
| Subsoil pH                  | S_PH_H2O: (-log(H <sup>+</sup> )) soil reaction; a measure of the acidity alkalinity of the subsoil (5 classes with specific agronomic significance)                                                                                                                                                                                                  |
| Base saturation             | T_BS: (%) measure the sum of exchangeable cations (nutrients) Na, Ca, Mg, and K as a percentage of the overall exchange capacity of the topsoil                                                                                                                                                                                                       |
| Calcium carbonate           | T_CACO3: (% weight) total topsoil lime content; calcium carbonate is the active ingredient in agricultural lime. Low levels enhance soil structure and are generally beneficial for crop production while higher concentrations may induce iron deficiency and limit the water storage capacity of soils                                              |
| CEC clay                    | T_CEC_CLAY: (Cmol/kg) topsoil cation exchange capacity of the clay fraction (classes 1-4)                                                                                                                                                                                                                                                             |
| CEC soil                    | T_CEC_SOIL: (Cmol/kg) Cation exchange capacity (total nutrient fixing capacity of a soil; topsoil with low CEC have little resilience and cannot build up stores of nutrients); the clay content, OM content, and clay type determine the total nutrient storage capacity; values > 10 cmol/kg are considered satisfactory for most crops (class 1-5) |
| Clay                        | T_CLAY: (% weight) percentage topsoil clay (diameter less than 0.002 mm; composed of fine-grained materials that are plastic when wet and hardens when heated; hydrated silicates or aluminum)                                                                                                                                                        |
| Sodium perc.                | T_ESP: (%) exchangeable topsoil sodium percentage; indicates levels of sodium hazards in crops                                                                                                                                                                                                                                                        |
| Gravel                      | T_GRAVEL: (% vol.) volume percentage topsoil gravel (materials larger than 2 mm)                                                                                                                                                                                                                                                                      |
| Organic carbon              | T_OC: (% weight) percentage of topsoil organic carbon; OC with pH is the best simple indicator of the health status of soils (moderate to high amounts of organic carbon are associated with fertile soils with good structure (codes 1-5, where 1 = very poor in organic carbon)                                                                     |
| Subsoil pH                  | S_PH_H2O: subsoil pH (H <sub>2</sub> O) (-log(H <sup>+</sup> )), soil reaction; a measure of the acidity alkalinity of the soil (5 classes with specific agronomic significance)                                                                                                                                                                      |
| Bulk density                | T_REF_BULK_DENSITY: (kg/dm <sup>3</sup> ) property of topsoil particulate materials; the mass of many particles of the material / volume (space between particles and the space inside of pores of individual particles) they occupy                                                                                                                  |
| Silt                        | T_SILT: (% weight) percentage topsoil silt (produced by mechanical weathering of rock as opposed to chemical weathering which produces clay; ranges in size from 0.002 to 0.050/0.0625 mm)                                                                                                                                                            |
| Exchangeable bases          | T_TEB: (% weight) total exchangeable bases in topsoil; the sum of exchangeable cations in a soil: sodium (Na), calcium (Ca), magnesium (Mg), and potassium (K)                                                                                                                                                                                        |
| Electrical conductivity     | T_ECE: (dS/m) topsoil electrical conductivity; crops vary significantly in their resistance and response to salt in soils (levels indicate agronomic relevant limits)                                                                                                                                                                                 |
| Sand                        | T_SAND: (% weight) Percentage sand (particles ranging in diameter from 0.0625 to 2 mm)                                                                                                                                                                                                                                                                |
| <b>Topography</b>           |                                                                                                                                                                                                                                                                                                                                                       |
| Slope                       | SLOPE: Slope (degrees)                                                                                                                                                                                                                                                                                                                                |
| Elevation                   | ELEVATION: Elevation (meters)                                                                                                                                                                                                                                                                                                                         |
| <b>Irrigation</b>           |                                                                                                                                                                                                                                                                                                                                                       |

|                                 |                                                                                                                                                                                                                                                                                                                                                                                                                                                                      |
|---------------------------------|----------------------------------------------------------------------------------------------------------------------------------------------------------------------------------------------------------------------------------------------------------------------------------------------------------------------------------------------------------------------------------------------------------------------------------------------------------------------|
| Irrigation                      | PERC_IRR: Percentage of agricultural land in every county utilizing irrigation (includes all land irrigated by artificial/controlled means, including lagoon wastewater distributed by sprinkler or flood system); measured as the number of agricultural acres irrigated and standardized by the total number of agricultural acres operated, per county. When NASS data was unavailable, % ag acres irrigated backfilled using linear interpolation of MirAD data. |
| <b>Diversity</b>                |                                                                                                                                                                                                                                                                                                                                                                                                                                                                      |
| Shannon's Diversity Index       | SDI_CDL_AG: ( $\geq 0$ , without limit) A measure of landscape <i>diversity</i> ; measured as the proportional abundance of each land use category in a county and used as a relative index to compare across landscapes or the same landscape at different times. SDI increases as richness and evenness increase.                                                                                                                                                  |
| <b>Farm inputs/management</b>   |                                                                                                                                                                                                                                                                                                                                                                                                                                                                      |
| Fertilizer                      | fert: Total expense of fertilizers, including lime and soil conditioners, rock phosphate and gypsum, and the cost of custom application, per agricultural acre; measured as total expense in USD \$ and standardized by the total number of agricultural acres operated, per county.                                                                                                                                                                                 |
| Chemicals                       | chem: Total expense of chemicals, including insecticides, herbicides, fungicides, and other pesticides, and the cost of custom application (excludes commercial fertilizer purchased), per agricultural acre; measured as total expense in USD \$ and standardized by the total number of agricultural acres operated, per county.                                                                                                                                   |
| Labor                           | labor_expense: Total expense of all laborers, per agricultural acre; measured as the total expense of laborers (hired, contract, and migrant) in USD \$ and standardized by the total number of agricultural acres operated, per county.                                                                                                                                                                                                                             |
| Machinery                       | machinery: Total asset value of agricultural machinery, per agricultural acre; measured as total machinery assets in USD \$ and standardized by the total number of agricultural acres operated, per county.                                                                                                                                                                                                                                                         |
| Corn acreage                    | perc_corn: Percentage of agricultural land in every county cultivated in corn.                                                                                                                                                                                                                                                                                                                                                                                       |
| <b>Farm assistance</b>          |                                                                                                                                                                                                                                                                                                                                                                                                                                                                      |
| Government receipts             | gvt_prog: Total cash receipts of government programs, per agricultural acre; measured in USD \$ per operation. <sup>1</sup>                                                                                                                                                                                                                                                                                                                                          |
| Insurance                       | insur_acres: Percentage of agricultural acres with crop insurance; measured as the number of crop acres with insurance and standardized by the total number of acres, per county. <sup>2</sup>                                                                                                                                                                                                                                                                       |
| <b>Farm(er) characteristics</b> |                                                                                                                                                                                                                                                                                                                                                                                                                                                                      |
| Years farming                   | exp: Average number of years experience on present operation.                                                                                                                                                                                                                                                                                                                                                                                                        |
| % farming as primary occupation | occup: Percentage of operators in a county whose primary occupation is farming, standardized by the total number of operators in the county.                                                                                                                                                                                                                                                                                                                         |
| % tenants                       | tenant: Percentage of agricultural acres operated by tenants (producers who operate land they rent from others and/or land they worked on shares for others); measured as the number of agricultural acres operated by tenants and standardized by the total number of agricultural acres operated, per county.                                                                                                                                                      |
| Median farm size                | acres_per_op: Median farm size (in acres per operation) in a county.                                                                                                                                                                                                                                                                                                                                                                                                 |

<sup>1</sup> This category consists of direct payments from the government and includes: payments from Conservation Reserve Program, Wetlands Reserve Program, Farmable Wetlands Program, and Conservation Reserve Enhancement Program; loan deficiency payments; disaster payments; other conservation programs; and all other federal farm programs under which payments were made directly to farm operators. Commodity Credit Corporation (CCC) proceeds, local and state government agricultural program payments, and federal crop insurance payments are not tabulated in this category ([25], p. 759).

<sup>2</sup> Agricultural land enrolled in any Federal, private, or other crop insurance programs, measured as the total number of acres with insurance and standardized by the total number of agricultural acres in a county ([25], p. 761).

**Table S2.** Average model performance. Comparing results using the full set of historical (a) available climate, soil, and topography predictors listed in SI Table 1 and (b) the subset included in the final manuscript for biophysical and farm(er) RF ensembles with default<sup>Δ</sup> and tuned hyperparameters using a 75/25 train test model (see [github.com/XXXX/corn-yield-infill/tune-RF.Rmd](https://github.com/XXXX/corn-yield-infill/tune-RF.Rmd)).

|                                                 | RMSE  | R <sup>2</sup> | MAE   | MAPE  |
|-------------------------------------------------|-------|----------------|-------|-------|
| <b>Biophysical models – default parameters*</b> |       |                |       |       |
| a) all available                                | 16.74 | 0.817          | 12.62 | 0.113 |
| b) subset                                       | 16.79 | 0.816          | 12.61 | 0.114 |
| <b>Biophysical models - tuned<sup>†</sup></b>   |       |                |       |       |
| a) all available                                | 16.74 | 0.817          | 12.62 | 0.113 |
| b) subset                                       | 16.75 | 0.817          | 12.63 | 0.113 |
| <b>Farm(er) models – default parameters</b>     |       |                |       |       |
| a) all available                                | 16.76 | 0.817          | 12.58 | 0.114 |
| b) subset                                       | 17.70 | 0.796          | 13.35 | 0.124 |
| <b>Farm(er) models – tuned<sup>◊</sup></b>      |       |                |       |       |
| a) all available                                | 16.75 | 0.817          | 12.56 | 0.113 |
| b) subset                                       | 17.39 | 0.803          | 13.06 | 0.118 |

<sup>Δ</sup> Default hyperparameters for ranger: ntree = 500, mtry = sqrt(ncol), nodesize = 5, sample fraction = 0.632

<sup>†</sup> Hyperparameter tuning for biophysical models: ntree = 2000, mtry = 7, node size = 4, sample fraction = 0.800

<sup>◊</sup> Hyperparameter tuning for farm(er) models: ntree = 2000, mtry = 19, node size = 4, sample fraction = 0.800

**Table S3.** RF variable importance rankings and accuracy metrics for biophysical models. Comparing results with mtry = 1 – 15 (by 2), min.node.size = 4, sample.fraction = 0.8, and ntree = 2,000 on biophysical data.

|                                                                      | mtry =1            | mtry = 3           | mtry = 5           | mtry = 7           | mtry = 9           | mtry = 11          | mtry = 13          | mtry = 15          |
|----------------------------------------------------------------------|--------------------|--------------------|--------------------|--------------------|--------------------|--------------------|--------------------|--------------------|
| <b>Performance statistics on <math>n = 4,246</math> county-years</b> |                    |                    |                    |                    |                    |                    |                    |                    |
| RMSE                                                                 | 19.70              | 17.61              | 17.31              | 17.22              | 17.23              | 17.23              | 17.24              | 17.25              |
| % variance explained                                                 | 0.747              | 0.798              | 0.804              | 0.807              | 0.806              | 0.806              | 0.806              | 0.806              |
| <b>Permutation variable importance</b>                               |                    |                    |                    |                    |                    |                    |                    |                    |
| 1 (most)                                                             | GDD                | GDD                | PERC_IRR           | PERC_IRR           | PERC_IRR           | PERC_IRR           | PERC_IRR           | PERC_IRR           |
| 2                                                                    | FRR                | PERC_IRR           | GDD                | GDD                | GDD                | YEAR               | FRR                | YEAR               |
| 3                                                                    | PERC_IRR           | YEAR               | YEAR               | YEAR               | YEAR               | GDD                | YEAR               | FRR                |
| 4                                                                    | YEAR               | FRR                | FRR                | FRR                | FRR                | FRR                | GDD                | GDD                |
| 5                                                                    | S_PH_H2O           | BV2                | BV2                | BV2                | BV2                | BV18               | BV18               | BV18               |
| 6                                                                    | BV2                | S_PH_H2O           | BV18               | BV18               | BV18               | BV2                | BV2                | BV2                |
| 7                                                                    | ELEVATION          | BV18               | S_PH_H2O           | SDI_CDL_AG         | SDI_CDL_AG         | SDI_CDL_AG         | SDI_CDL_AG         | SDI_CDL_AG         |
| 8                                                                    | BV4                | BV9                | SDI_CDL_AG         | S_PH_H2O           | S_PH_H2O           | S_PH_H2O           | S_PH_H2O           | S_PH_H2O           |
| 9                                                                    | BV19               | SDI_CDL_AG         | BV9                | BV9                | BV9                | BV9                | BV9                | BV9                |
| 10                                                                   | BV9                | BV4                | ELEVATION          | ELEVATION          | ELEVATION          | BV4                | BV4                | BV4                |
| 11                                                                   | T_CEC_SOIL         | ELEVATION          | BV4                | BV4                | BV4                | ELEVATION          | ELEVATION          | ELEVATION          |
| 12                                                                   | BV18               | T_CEC_SOIL         | T_CEC_SOIL         | T_CEC_SOIL         | BV19               | BV19               | BV19               | BV19               |
| 13                                                                   | SDI_CDL_AG         | BV19               | BV19               | BV19               | T_CEC_SOIL         | T_CEC_SOIL         | TP                 | SLOPE              |
| 14                                                                   | T_REF_BULK_DENSITY | TP                 | TP                 | TP                 | TP                 | TP                 | SLOPE              | TP                 |
| 15                                                                   | SLOPE              | SLOPE              | SLOPE              | SLOPE              | SLOPE              | SLOPE              | T_CEC_SOIL         | T_CEC_SOIL         |
| 16                                                                   | TP                 | T_REF_BULK_DENSITY | T_OC               | T_OC               | T_OC               | T_OC               | T_OC               | T_OC               |
| 17                                                                   | T_OC               | T_OC               | BV15               | BV15               | BV15               | BV15               | BV15               | BV15               |
| 18                                                                   | BV15               | BV15               | T_REF_BULK_DENSITY | T_REF_BULK_DENSITY | T_REF_BULK_DENSITY | T_REF_BULK_DENSITY | BV8                | BV8                |
| 19 (least)                                                           | BV8                | BV8                | BV8                | BV8                | BV8                | BV8                | T_REF_BULK_DENSITY | T_REF_BULK_DENSITY |

**Table S4.** RF variable importance rankings and accuracy metrics for farm(er) models. Comparing results with mtry = 5 – 19 (by 2), min.node.size = 4, sample.fraction = 0.8, and ntree = 2,000 on farm(er) data (farm(er) covariates **bolded**).

|                      | mtry = 5                                           | mtry = 7           | mtry = 9           | mtry = 11          | mtry = 13          | mtry = 15          | mtry = 17          | mtry = 19          |
|----------------------|----------------------------------------------------|--------------------|--------------------|--------------------|--------------------|--------------------|--------------------|--------------------|
|                      | Performance statistics on $n = 4,246$ county-years |                    |                    |                    |                    |                    |                    |                    |
| RMSE                 | 17.82                                              | 17.57              | 17.47              | 17.38              | 17.34              | 17.31              | 17.30              | 17.30              |
| % variance explained | 0.793                                              | 0.797              | 0.801              | 0.803              | 0.804              | 0.805              | 0.805              | 0.805              |
|                      | Permutation variable importance                    |                    |                    |                    |                    |                    |                    |                    |
| 1 (most)             | YEAR                                               | PERC_IRR           |
| 2                    | PERC_IRR                                           | YEAR               |
| 3                    | GDD                                                | GDD                | GDD                | GDD                | GDD                | GDD                | GDD                | GDD                |
| 4                    | chem                                               | fert               |
| 5                    | fert                                               | chem               | BV18               | BV18               | BV18               | BV18               | BV18               | BV18               |
| 6                    | BV18                                               | BV18               | chem               | chem               | chem               | chem               | chem               | chem               |
| 7                    | BV2                                                | BV2                | BV2                | perc_corn          | BV2                | BV2                | BV2                | BV2                |
| 8                    | perc_corn                                          | perc_corn          | perc_corn          | BV2                | perc_corn          | perc_corn          | perc_corn          | SDI_CDL_AG         |
| 9                    | insur_acres                                        | insur_acres        | insur_acres        | S_PH_H2O           | S_PH_H2O           | S_PH_H2O           | S_PH_H2O           | S_PH_H2O           |
| 10                   | S_PH_H2O                                           | S_PH_H2O           | S_PH_H2O           | insur_acres        | insur_acres        | SDI_CDL_AG         | SDI_CDL_AG         | perc_corn          |
| 11                   | gvt_prog                                           | gvt_prog           | gvt_prog           | BV9                | BV9                | BV9                | BV9                | BV9                |
| 12                   | FRR                                                | BV9                | BV9                | gvt_prog           | govt_prog          | insur_acres        | insur_acres        | insur_acres        |
| 13                   | BV9                                                | ELEVATION          | ELEVATION          | SDI_CDL_AG         | SDI_CDL_AG         | BV4                | BV4                | BV4                |
| 14                   | machinery                                          | FRR                | BV4                | ELEVATION          | gvt_prog           | gvt_prog           | ELEVATION          | ELEVATION          |
| 15                   | ELEVATION                                          | machinery          | FRR                | BV4                | ELEVATION          | ELEVATION          | gvt_prog           | gvt_prog           |
| 16                   | BV4                                                | BV4                | machinery          | FRR                | BV4                | FRR                | machinery          | machinery          |
| 17                   | T_CEC_SOIL                                         | T_CEC_SOIL         | T_CEC_SOIL         | machinery          | machinery          | T_CEC_SOIL         | T_CEC_SOIL         | T_CEC_SOIL         |
| 18                   | SDI_CDL_AG                                         | SDI_CDL_AG         | SDI_CDL_AG         | T_CEC_SOIL         | FRR                | machinery          | FRR                | FRR                |
| 19                   | TP                                                 | TP                 | TP                 | TP                 | T_CEC_SOIL         | TP                 | TP                 | TP                 |
| 20                   | BV19                                               | BV19               | BV19               | BV19               | TP                 | BV19               | BV19               | BV19               |
| 21                   | labor_expense                                      | labor_expense      | labor_expense      | labor_expense      | BV19               | labor_expense      | labor_expense      | labor_expense      |
| 22                   | acres_per_op                                       | acres_per_op       | SLOPE              | SLOPE              | labor_expense      | SLOPE              | SLOPE              | SLOPE              |
| 23                   | T_REF_BULK_DENSITY                                 | T_REF_BULK_DENSITY | acres_per_op       | acres_per_op       | SLOPE              | acres_per_op       | BV15               | BV15               |
| 24                   | SLOPE                                              | SLOPE              | T_REF_BULK_DENSITY | T_REF_BULK_DENSITY | acres_per_op       | BV15               | acres_per_op       | TOC                |
| 25                   | T_OC                                               | T_OC               | T_OC               | T_OC               | T_OC               | T_OC               | T_OC               | acres_per_op       |
| 26                   | BV15                                               | BV15               | BV15               | BV15               | BV15               | BV8                | BV8                | BV8                |
| 27                   | tenant                                             | BV8                | BV8                | BV8                | T_REF_BULK_DENSITY | T_REF_BULK_DENSITY | T_REF_BULK_DENSITY | T_REF_BULK_DENSITY |
| 28                   | BV8                                                | tenant             |
| 29                   | occup                                              | occup              | occup              | occup              | occup              | occup              | occup              | occup              |
| 30 (least)           | exp                                                | exp                | exp                | exp                | exp                | exp                | exp                | exp                |

**Table S5.** List of counties excluded due to missing data across census years, with Census FIPS codes. Note: See SI Figure 3 for map of counties excluded.

| GEOID | County               | State      |
|-------|----------------------|------------|
| 04001 | Apache               | Arizona    |
| 04005 | Coconino             | Arizona    |
| 04007 | Gila                 | Arizona    |
| 04012 | La Paz               | Arizona    |
| 04019 | Pima                 | Arizona    |
| 05013 | Calhoun              | Arkansas   |
| 05025 | Cleveland            | Arkansas   |
| 05039 | Dallas               | Arkansas   |
| 06003 | Alpine               | California |
| 06015 | Del Norte            | California |
| 06051 | Mono                 | California |
| 06057 | Nevada               | California |
| 06075 | San Francisco        | California |
| 06105 | Trinity              | California |
| 08014 | Broomfield           | Colorado   |
| 08019 | Clear Creek          | Colorado   |
| 08031 | Denver               | Colorado   |
| 08047 | Gilpin               | Colorado   |
| 08053 | Hinsdale             | Colorado   |
| 08065 | Lake                 | Colorado   |
| 08079 | Mineral              | Colorado   |
| 08097 | Pitkin               | Colorado   |
| 08111 | San Juan             | Colorado   |
| 08117 | Summit               | Colorado   |
| 11001 | District of Columbia |            |
| 12003 | Baker                | Florida    |
| 12005 | Bay                  | Florida    |
| 12037 | Franklin             | Florida    |
| 12045 | Gulf                 | Florida    |
| 12073 | Leon                 | Florida    |
| 12077 | Liberty              | Florida    |
| 12087 | Monroe               | Florida    |
| 12089 | Nassau               | Florida    |
| 12103 | Pinellas             | Florida    |
| 12123 | Taylor               | Florida    |
| 12129 | Wakulla              | Florida    |
| 13029 | Bryan                | Georgia    |
| 13039 | Camden               | Georgia    |
| 13053 | Chattahoochee        | Georgia    |
| 13059 | Clarke               | Georgia    |
| 13063 | Clayton              | Georgia    |
| 13065 | Clinch               | Georgia    |
| 13089 | DeKalb               | Georgia    |
| 13097 | Douglas              | Georgia    |
| 13101 | Echols               | Georgia    |
| 13127 | Glynn                | Georgia    |
| 13179 | Liberty              | Georgia    |
| 13183 | Long                 | Georgia    |
| 13191 | McIntosh             | Georgia    |
| 13215 | Muscogee             | Georgia    |
| 13225 | Peach                | Georgia    |
| 13239 | Quitman              | Georgia    |
| 13247 | Rockdale             | Georgia    |
| 13263 | Talbot               | Georgia    |
| 13265 | Taliaferro           | Georgia    |
| 13281 | Towns                | Georgia    |
| 13289 | Twiggs               | Georgia    |

|       |                  |               |
|-------|------------------|---------------|
| 16003 | Adams            | Idaho         |
| 16015 | Boise            | Idaho         |
| 16017 | Bonner           | Idaho         |
| 16079 | Shoshone         | Idaho         |
| 16085 | Valley           | Idaho         |
| 17031 | Cook             | Illinois      |
| 17043 | DuPage           | Illinois      |
| 18013 | Brown            | Indiana       |
| 21013 | Bell             | Kentucky      |
| 21071 | Floyd            | Kentucky      |
| 21095 | Harlan           | Kentucky      |
| 21115 | Johnson          | Kentucky      |
| 21119 | Knott            | Kentucky      |
| 21121 | Knox             | Kentucky      |
| 21129 | Lee              | Kentucky      |
| 21131 | Leslie           | Kentucky      |
| 21133 | Letcher          | Kentucky      |
| 21159 | Martin           | Kentucky      |
| 21193 | Perry            | Kentucky      |
| 21195 | Pike             | Kentucky      |
| 22033 | East Baton Rouge | Louisiana     |
| 22051 | Jefferson        | Louisiana     |
| 22059 | LaSalle          | Louisiana     |
| 22071 | Orleans          | Louisiana     |
| 22087 | St. Bernard      | Louisiana     |
| 22089 | St. Charles      | Louisiana     |
| 23023 | Sagadahoc        | Maine         |
| 24510 | Baltimore        | Maryland      |
| 25007 | Dukes            | Massachusetts |
| 25019 | Nantucket        | Massachusetts |
| 25025 | Suffolk          | Massachusetts |
| 26013 | Baraga           | Michigan      |
| 26039 | Crawford         | Michigan      |
| 26053 | Gogebic          | Michigan      |
| 26083 | Keweenaw         | Michigan      |
| 26095 | Luce             | Michigan      |
| 26119 | Montmorency      | Michigan      |
| 26135 | Oscoda           | Michigan      |
| 26143 | Roscommon        | Michigan      |
| 26153 | Schoolcraft      | Michigan      |
| 27031 | Cook             | Minnesota     |
| 27075 | Lake             | Minnesota     |
| 27123 | Ramsey           | Minnesota     |
| 28129 | Smith            | Mississippi   |
| 29510 | St. Louis        | Missouri      |
| 30053 | Lincoln          | Montana       |
| 30061 | Mineral          | Montana       |
| 30093 | Silver Bow       | Montana       |
| 31075 | Grant            | Nebraska      |
| 32009 | Esmeralda        | Nevada        |
| 32011 | Eureka           | Nevada        |
| 32017 | Lincoln          | Nevada        |
| 32021 | Mineral          | Nevada        |
| 32029 | Storey           | Nevada        |
| 32510 | Carson City      | Nevada        |
| 33003 | Carroll          | New Hampshire |
| 33019 | Sullivan         | New Hampshire |
| 34003 | Bergen           | New Jersey    |
| 34009 | Cape May         | New Jersey    |
| 34013 | Essex            | New Jersey    |
| 34017 | Hudson           | New Jersey    |

|       |                  |                |
|-------|------------------|----------------|
| 34029 | Ocean            | New Jersey     |
| 34031 | Passaic          | New Jersey     |
| 34039 | Union            | New Jersey     |
| 35021 | Harding          | New Mexico     |
| 35028 | Los Alamos       | New Mexico     |
| 35049 | Santa Fe         | New Mexico     |
| 36005 | Bronx            | New York       |
| 36041 | Hamilton         | New York       |
| 36047 | Kings            | New York       |
| 36059 | Nassau           | New York       |
| 36061 | New York         | New York       |
| 36079 | Putnam           | New York       |
| 36081 | Queens           | New York       |
| 36085 | Richmond         | New York       |
| 36087 | Rockland         | New York       |
| 36113 | Warren           | New York       |
| 36119 | Westchester      | New York       |
| 37055 | Dare             | North Carolina |
| 37129 | New Hanover      | North Carolina |
| 41007 | Clatsop          | Oregon         |
| 41041 | Lincoln          | Oregon         |
| 41057 | Tillamook        | Oregon         |
| 42023 | Cameron          | Pennsylvania   |
| 42045 | Delaware         | Pennsylvania   |
| 42053 | Forest           | Pennsylvania   |
| 42101 | Philadelphia     | Pennsylvania   |
| 42103 | Pike             | Pennsylvania   |
| 44001 | Bristol          | South Dakota   |
| 44003 | Kent             | South Dakota   |
| 47171 | Unicoi           | Tennessee      |
| 48007 | Aransas          | Texas          |
| 48103 | Crane            | Texas          |
| 48135 | Ector            | Texas          |
| 48183 | Gregg            | Texas          |
| 48261 | Kenedy           | Texas          |
| 48269 | King             | Texas          |
| 48301 | Loving           | Texas          |
| 48377 | Presidio         | Texas          |
| 48475 | Ward             | Texas          |
| 48495 | Winkler          | Texas          |
| 49009 | Daggett          | Utah           |
| 49019 | Grand            | Utah           |
| 49047 | Uintah           | Utah           |
| 51013 | Arlington        | Virginia       |
| 51027 | Buchanan         | Virginia       |
| 51051 | Dickenson        | Virginia       |
| 51057 | Essex            | Virginia       |
| 51510 | Alexandria       | Virginia       |
| 51520 | Bristol          | Virginia       |
| 51530 | Buena Vista      | Virginia       |
| 51540 | Charlottesville  | Virginia       |
| 51570 | Colonial Heights | Virginia       |
| 51580 | Covington        | Virginia       |
| 51590 | Danville         | Virginia       |
| 51595 | Emporia          | Virginia       |
| 51600 | Fairfax          | Virginia       |
| 51610 | Falls Church     | Virginia       |
| 51620 | Franklin         | Virginia       |
| 51630 | Fredericksburg   | Virginia       |
| 51640 | Galax            | Virginia       |
| 51650 | Hampton          | Virginia       |

|       |               |               |
|-------|---------------|---------------|
| 51660 | Harrisonburg  | Virginia      |
| 51670 | Hopewell      | Virginia      |
| 51678 | Lexington     | Virginia      |
| 51680 | Lynchburg     | Virginia      |
| 51683 | Manassas      | Virginia      |
| 51685 | Manassas Park | Virginia      |
| 51690 | Martinsville  | Virginia      |
| 51700 | Newport News  | Virginia      |
| 51710 | Norfolk       | Virginia      |
| 51720 | Norton        | Virginia      |
| 51730 | Petersburg    | Virginia      |
| 51735 | Poquoson      | Virginia      |
| 51740 | Portsmouth    | Virginia      |
| 51750 | Radford       | Virginia      |
| 51760 | Richmond      | Virginia      |
| 51770 | Roanoke       | Virginia      |
| 51775 | Salem         | Virginia      |
| 51790 | Staunton      | Virginia      |
| 51820 | Waynesboro    | Virginia      |
| 51830 | Williamsburg  | Virginia      |
| 51840 | Winchester    | Virginia      |
| 53009 | Clallam       | West Virginia |
| 53031 | Jefferson     | West Virginia |
| 53045 | Mason         | West Virginia |
| 53051 | Pend Oreille  | West Virginia |
| 53055 | San Juan      | West Virginia |
| 53059 | Skamania      | West Virginia |
| 53069 | Wahkiakum     | West Virginia |
| 54005 | Boone         | Wisconsin     |
| 54007 | Braxton       | Wisconsin     |
| 54009 | Brooke        | Wisconsin     |
| 54013 | Calhoun       | Wisconsin     |
| 54015 | Clay          | Wisconsin     |
| 54017 | Doddridge     | Wisconsin     |
| 54019 | Fayette       | Wisconsin     |
| 54021 | Gilmer        | Wisconsin     |
| 54039 | Kanawha       | Wisconsin     |
| 54041 | Lewis         | Wisconsin     |
| 54045 | Logan         | Wisconsin     |
| 54047 | McDowell      | Wisconsin     |
| 54051 | Marshall      | Wisconsin     |
| 54055 | Mercer        | Wisconsin     |
| 54059 | Mingo         | Wisconsin     |
| 54073 | Pleasants     | Wisconsin     |
| 54081 | Raleigh       | Wisconsin     |
| 54085 | Ritchie       | Wisconsin     |
| 54089 | Summers       | Wisconsin     |
| 54091 | Taylor        | Wisconsin     |
| 54095 | Tyler         | Wisconsin     |
| 54101 | Webster       | Wisconsin     |
| 54103 | Wetzel        | Wisconsin     |
| 54109 | Wyoming       | Wisconsin     |
| 55037 | Florence      | Wyoming       |
| 55078 | Menominee     | Wyoming       |
| 55125 | Vilas         | Wyoming       |

**Table S6.** The RMSE accuracy results for one iteration of PyCaret package using all possible explanatory variables. Results are provided using a 75/25 training/test approach, along with the results for 5-fold cross validation.

| Model Name                      | RMSE ~ Training/Test Results | RMSE ~ 5-fold Cross Validation Results |
|---------------------------------|------------------------------|----------------------------------------|
| Extra Trees Regressor           | 16.82                        | 15.69                                  |
| Light Gradient Boosting Machine | 18.04                        | 17.15                                  |
| Random Forest Regressor         | 18.10                        | 16.82                                  |
| Gradient Boosting Regressor     | 21.11                        | 21.02                                  |
| K Neighbors Regressor           | 23.41                        | 22.28                                  |
| Decision Tree Regressor         | 25.62                        | 25.26                                  |
| AdaBoost Regressor              | 25.62                        | 26.60                                  |
| Ridge Regression                | 25.90                        | 26.48                                  |
| Linear Regression               | 25.90                        | 26.48                                  |
| Bayesian Ridge                  | 25.95                        | 26.50                                  |
| Lasso Regression                | 26.41                        | 26.93                                  |
| Elastic Net                     | 26.58                        | 27.07                                  |
| Huber Regressor                 | 29.42                        | 29.71                                  |
| Least Angle Regression          | 26.46                        | 26.48                                  |
| Orthogonal Matching Pursuit     | 32.28                        | 32.82                                  |
| Dummy Regressor                 | 38.98                        | 39.38                                  |
| Lasso Least Angle Regression    | 38.98                        | 39.38                                  |
| Passive Aggressive Regressor    | 34.40                        | 43.21                                  |

**Figure S1.** Count of missingness across Survey years. Note: Where category is 0, a county reported yield data across all 11 years (e.g., Corn Belt), where the category is 10, a county reported only 1 year of yield data (e.g., southern Arizona). The “missing” category refers to all counties where NASS reported no corn yields from 2008–2018; these counties may be “missing” because they produced no corn, or, more likely, because there were not enough reporting growers to meet NASS statistical disclosure requirements.

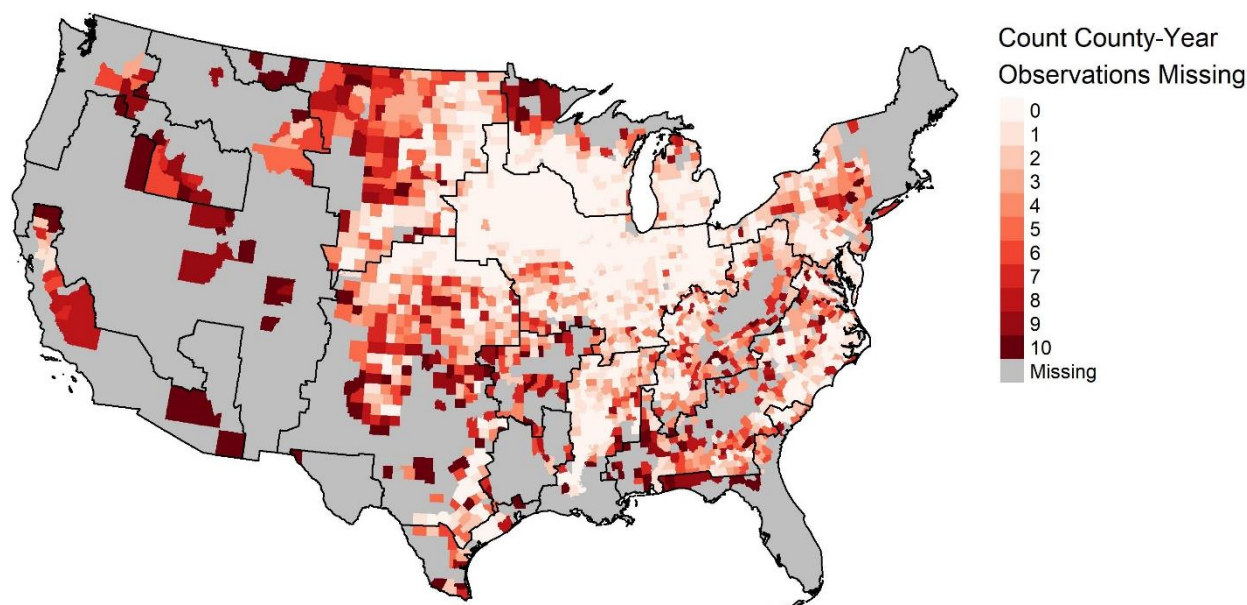

**Figure S2.** Correlation matrix for continuous predictors and corn yield (see Table S1, above for variables, units, and descriptions associated with variable names listed below).

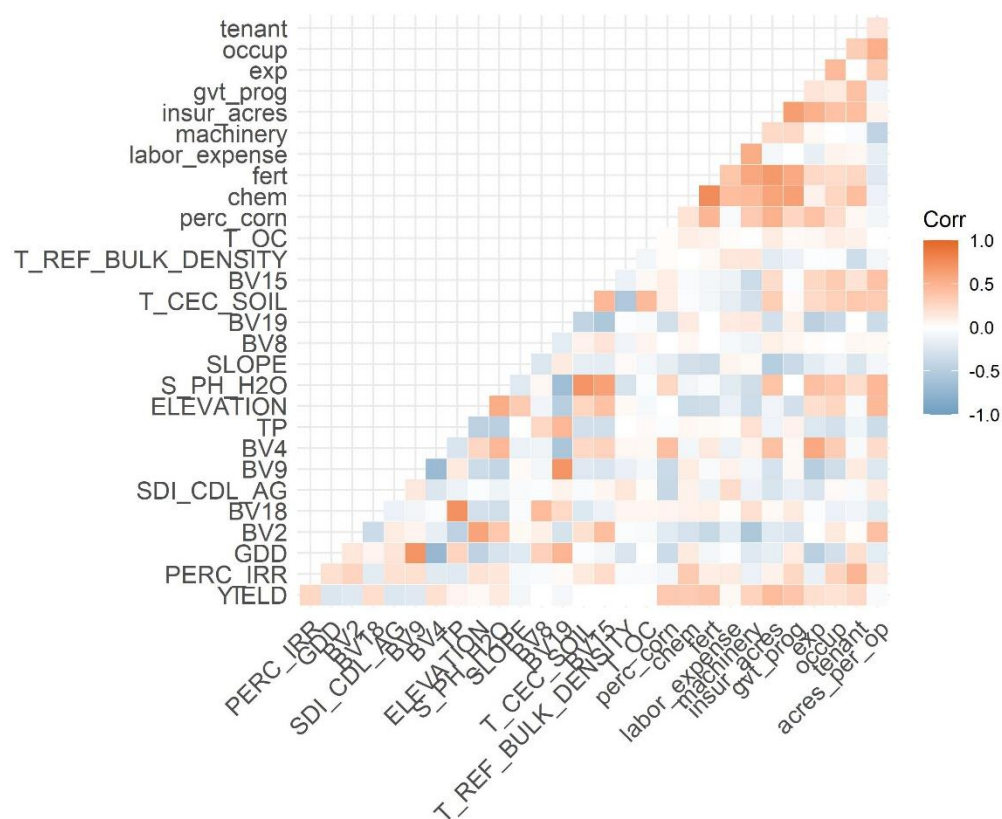

**Figure S3.** Map of counties excluded due to missing data across census years. Note: “Missing” here refers to all other US counties not removed due to CoA imputation.

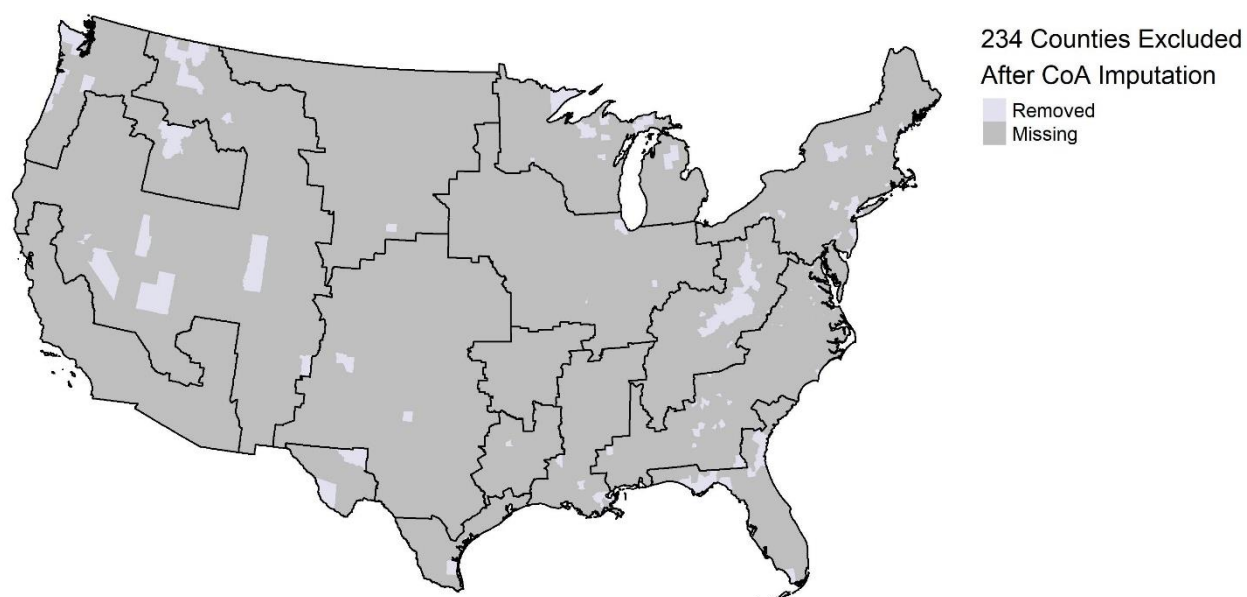

**Figure S4.** Biophysical RF ensemble model performance based on five-fold cross validation. A) Average error in model predictions in bushels/acre observed across ensemble models ( $n = 50$  replications) and years (2008–2018). Counties in which predicted yields were less (greater) than observed yields appear in shades of red (blue). B) Observed v. predicted plot for the full panel dataset. The dashed line indicates a 1:1 relationship, the solid blue line shows a linear regression between the observed and predicted yields.

**A.**

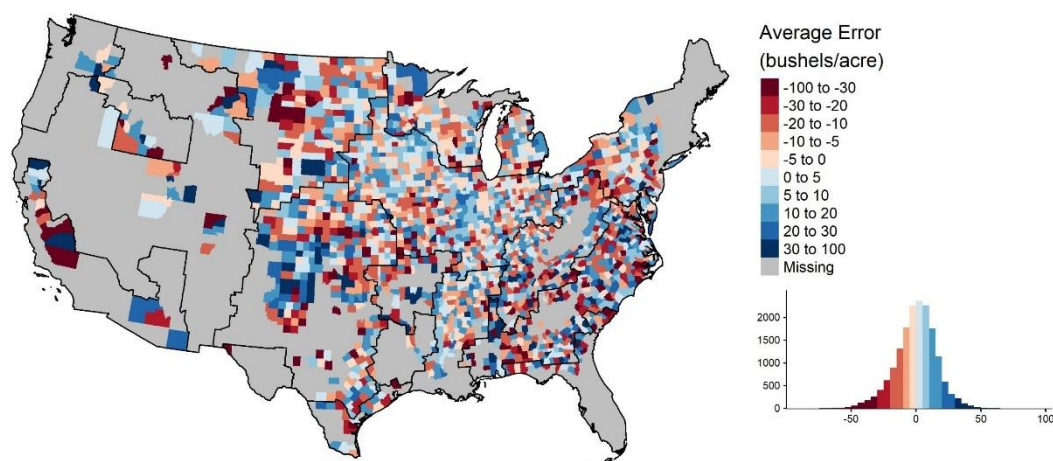

**B.**

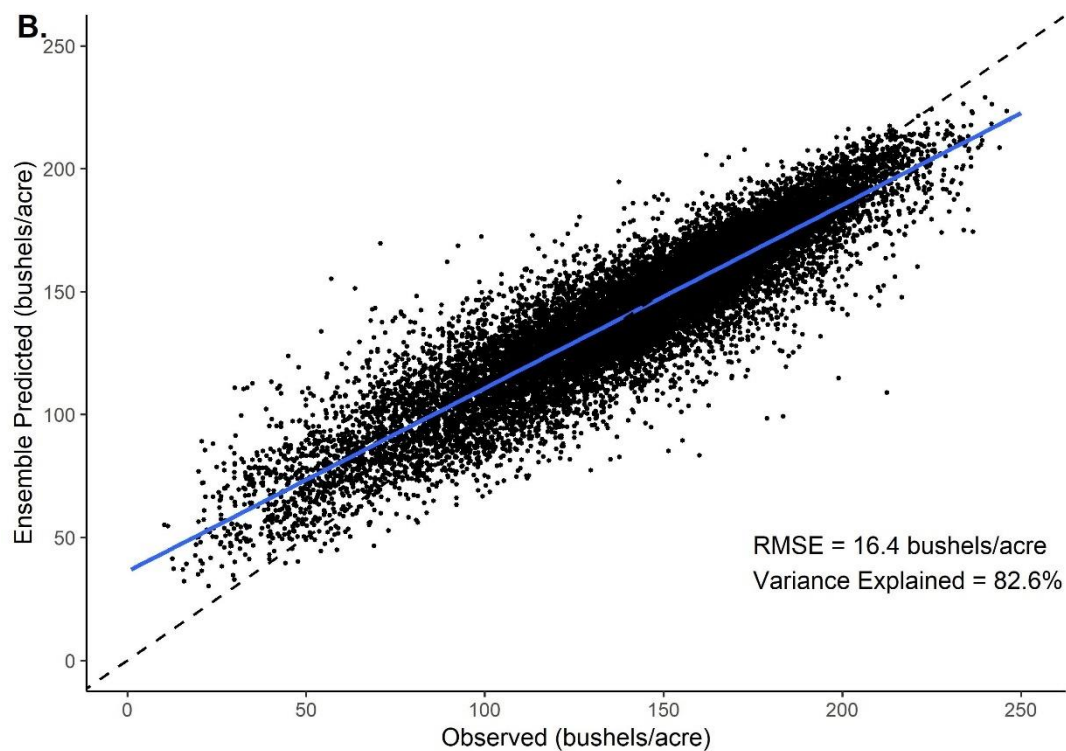

**Figure S5.** Farm(er) RF ensemble model performance based on five-fold cross validation. A) Average error in model predictions in bushels/acre observed across ensemble models ( $n = 50$  replications) and years (2008–2018). Counties in which predicted yields were less (greater) than observed yields appear in shades of red (blue). B) Observed v. predicted plot for the full panel dataset. The dashed line indicates a 1:1 relationship, the solid blue line shows a linear regression between the observed and predicted yields.

**A.**

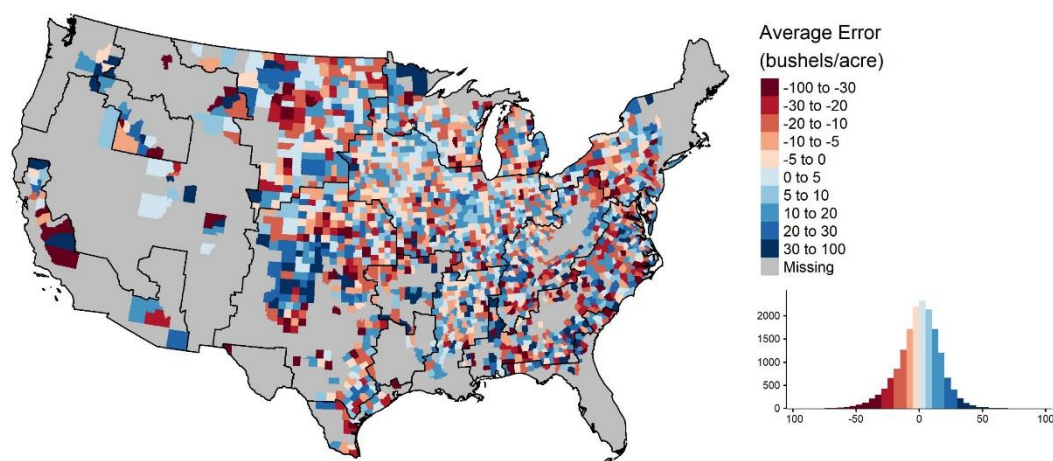

**B.**

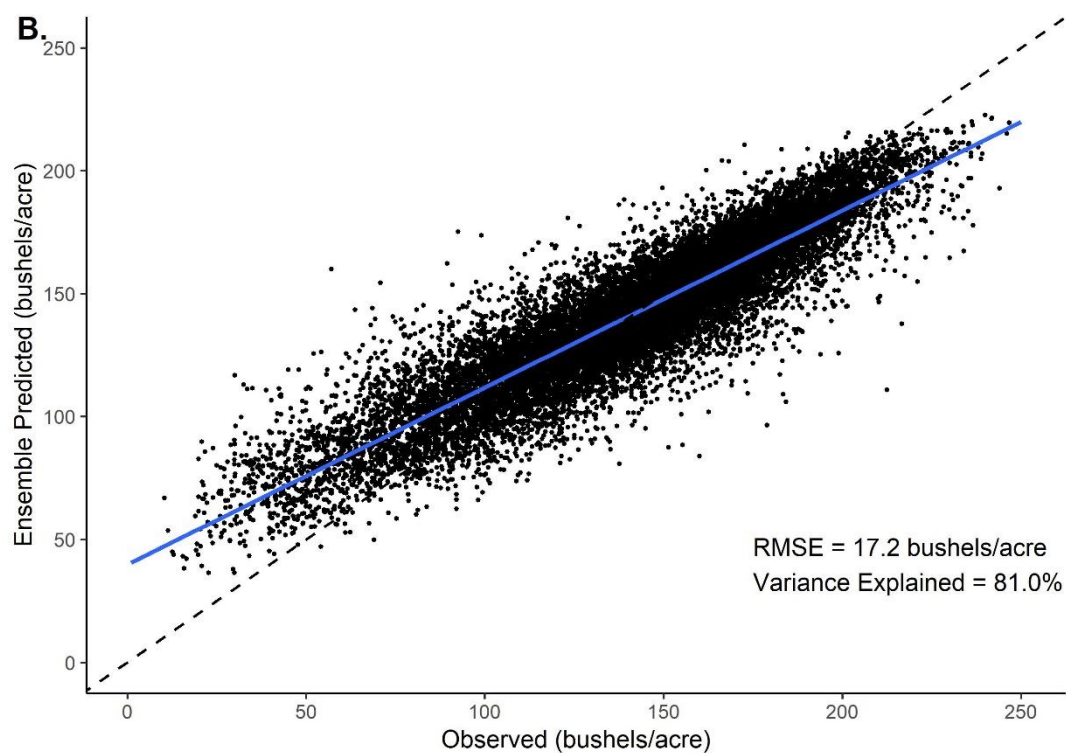

**Figure S6.** Group exclusion (climate + space + time) RF ensemble model performance based on five-fold cross validation. A) Average error in model predictions in bushels/acre observed across ensemble models ( $n = 50$  replications) and years (2008–2018). Counties in which predicted yields were less (greater) than observed yields appear in shades of red (blue). B) Observed v. predicted plot for the full panel dataset. The dashed line indicates a 1:1 relationship, the solid blue line shows a linear regression between the observed and predicted yields.

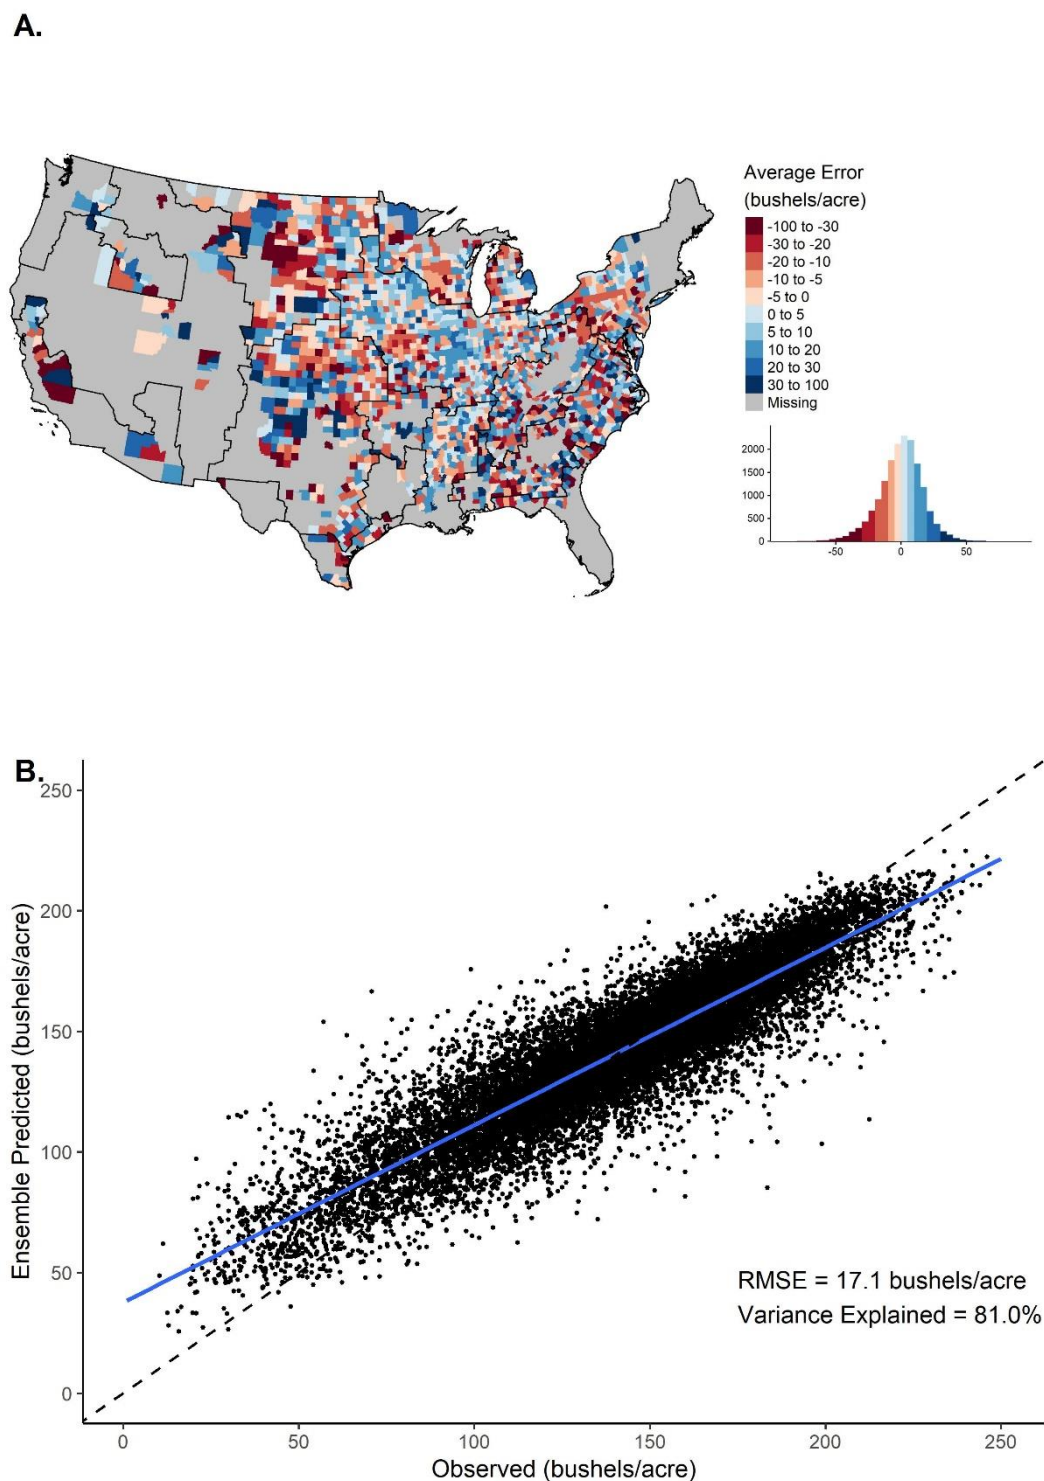

**Figure S7.** Boxplots of absolute percentage errors (APE) via 5-fold cross validation (one iteration) for all counties as organized by number of missing years. This figure shows that counties with less years of missing yield measurements (1-4 missing years) tend to have slightly smaller relative errors than counties with 5 or more missing years of yield measurement. It also shows that counties with missing values for almost all years tend to have the most extreme relative errors.

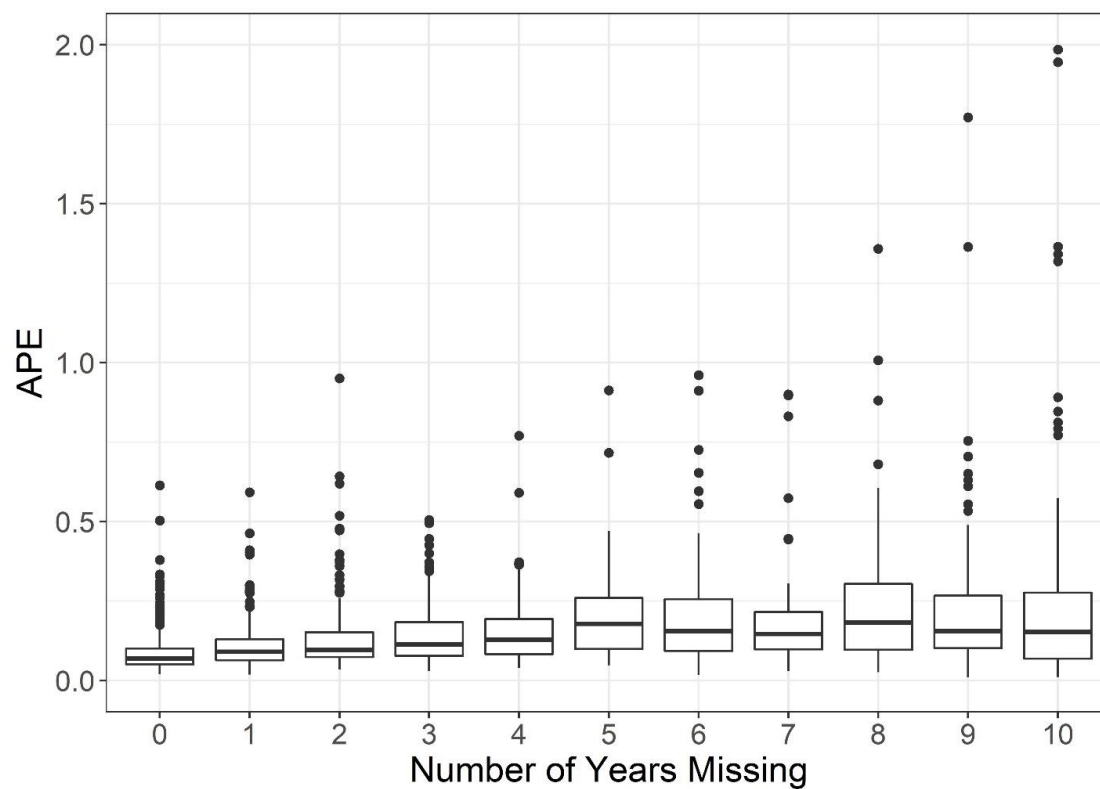

**Figure S8.** Partial dependence plots for consistently important variables in the a) biophysical ensemble and b) farm(er) ensemble. Partial dependence is the dependence of the outcome on one predictor after averaging out the effects of all other predictors in the model [37]. Partial dependence plots graphically characterize the relationship between an individual predictor (standardized, here) and the predicted values of yield (see Figure S9a-j for unstandardized relationships).

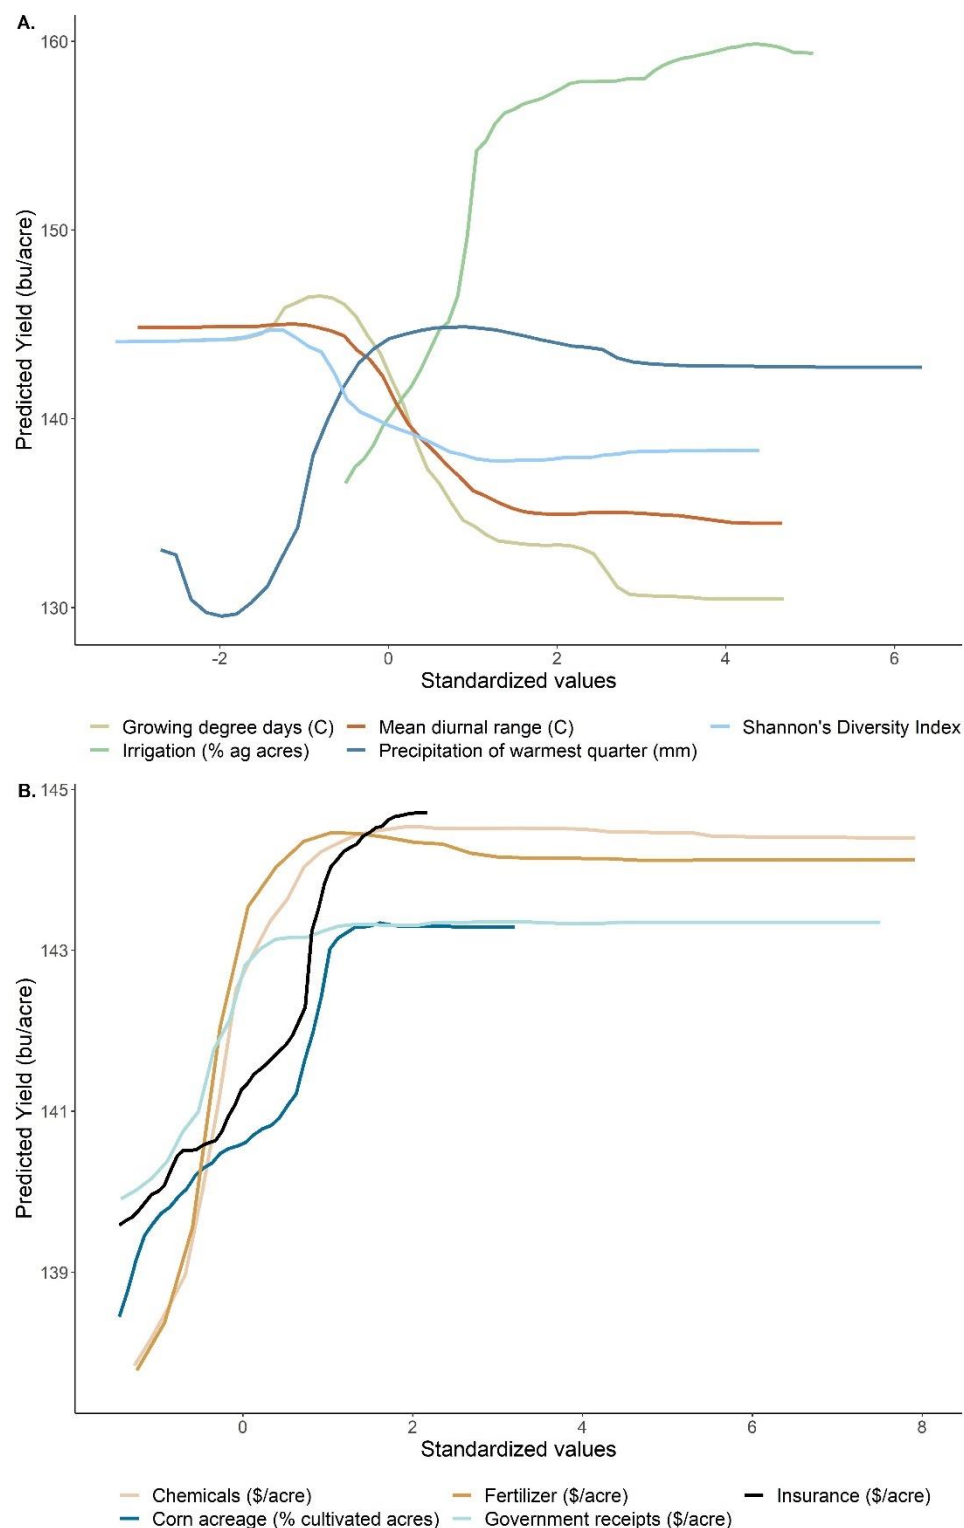

**Figure S9.** Partial dependence plots of important variables from biophysical and farm(er) ensembles (raw data, not standardized). Partial dependence is the dependence of the outcome on one predictor after averaging out the effects of all other predictors in the model [37]. Partial dependence plots graphically characterize the relationship between an individual predictor and the predicted values of yield. Partial dependence on: A) chemicals (\$/acre); B) % cultivated area in corn (perc\_corn); C) fertilizers (\$/acre); D) government receipts (\$/acre); E) growing degree days (GDD); F) insurance (\$/acre); G) irrigation (PERC\_IRR); H) mean diurnal range (BV2); I) precipitation of the warmest quarter (BV18); J) Shannon's Diversity Index (SDI\_CDL\_AG).

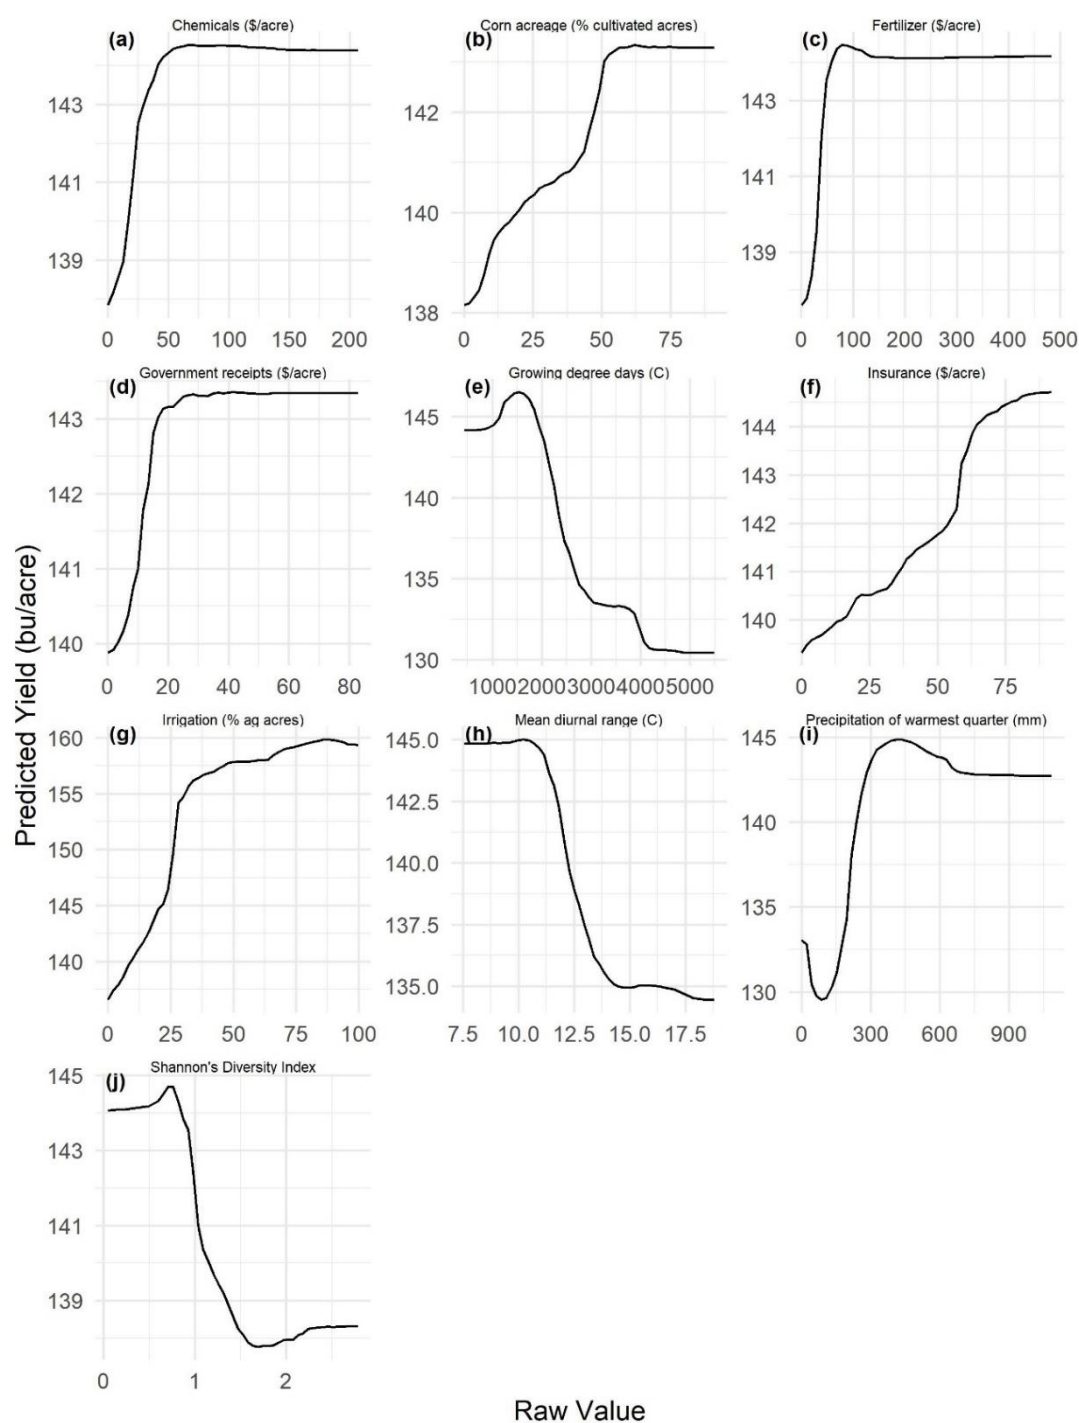

**Figure S10.** Partial dependence plots of important variables from the reduced ensemble (raw data, not standardized). Partial dependence is the dependence of the outcome on one predictor after averaging out the effects of all other predictors in the model [37]. Partial dependence plots graphically characterize the relationship between an individual predictor and the predicted values of yield. Partial dependence on: A) growing degree days (GDD); B) Irrigation (PERC\_IRR); C) Latitude (lat); D) Longitude (lon); E) mean diurnal range (BV2); F) Mean temperature of the driest quarter (BV9); G) mean temperature of the wettest quarter (BV8); H) Precipitation of the coldest quarter (BV19); I) Precipitation of the warmest quarter (BV18); J) Precipitation seasonality (BV15); K) Temperature seasonality (BV4); L) Total precipitation (TP); and M) Year.

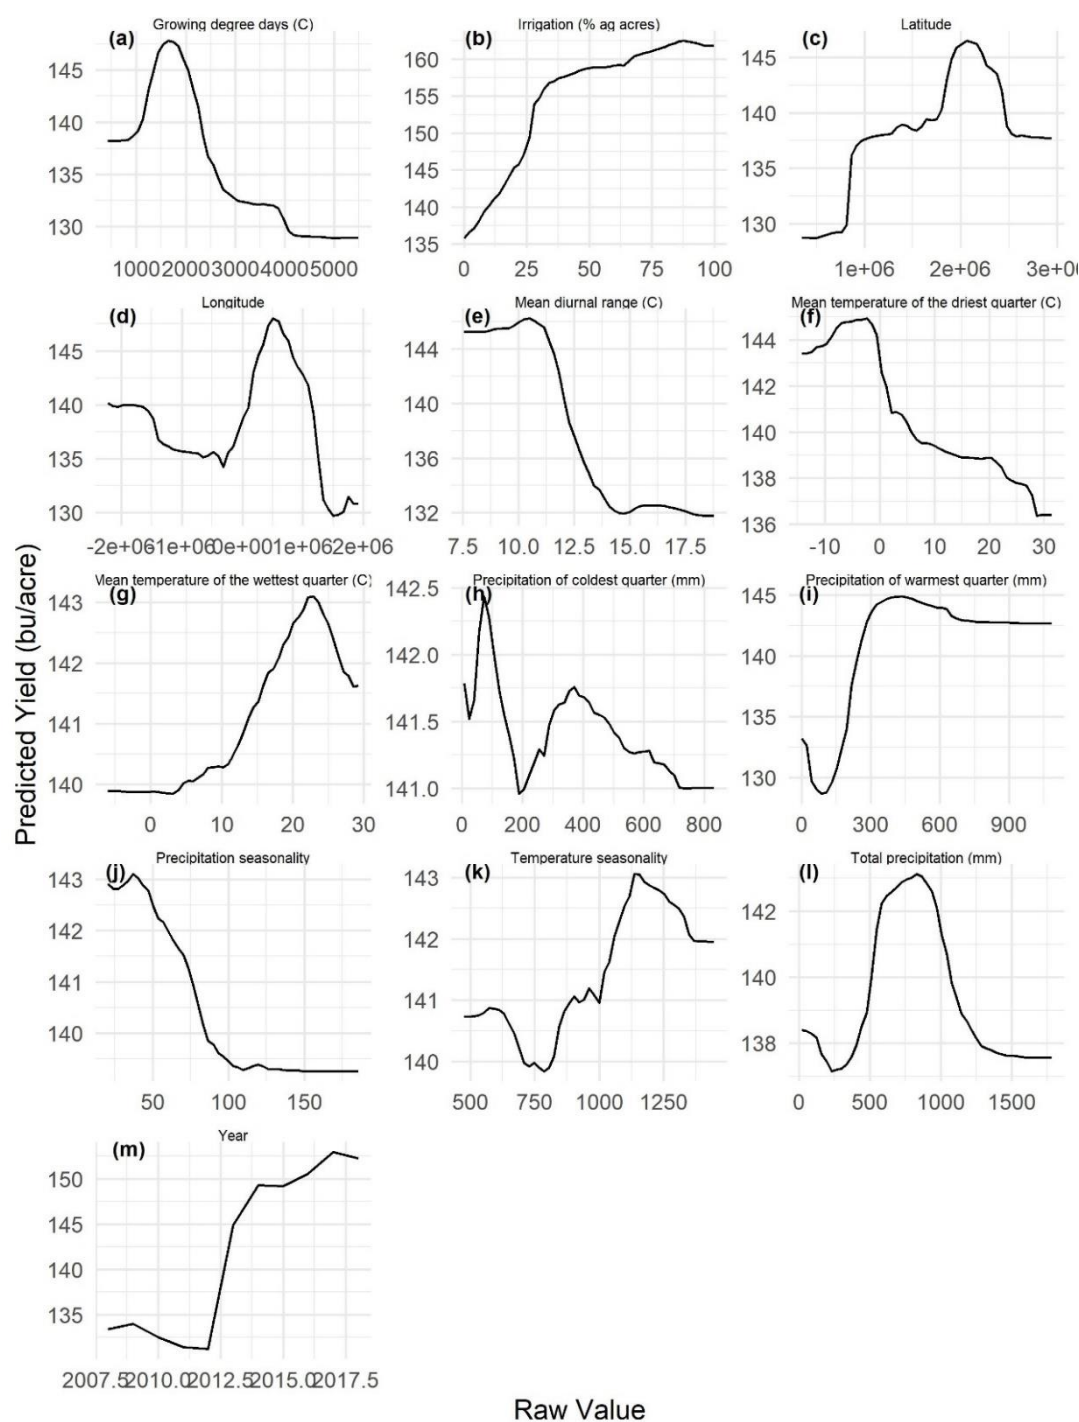

**Figure S11.** Bivariate choropleth constructed by binning county-level average corn yield (bushels/acre) and percent acres cultivated in corn on agricultural lands into thirds; each tercile is then paired and binned into distinct categories. Yellow indicates counties with high average corn yields and an agricultural landscape dominated by corn production, while purple indicates counties with low average yields and a low percentage of agricultural acres in corn. Gray counties indicate missing data.

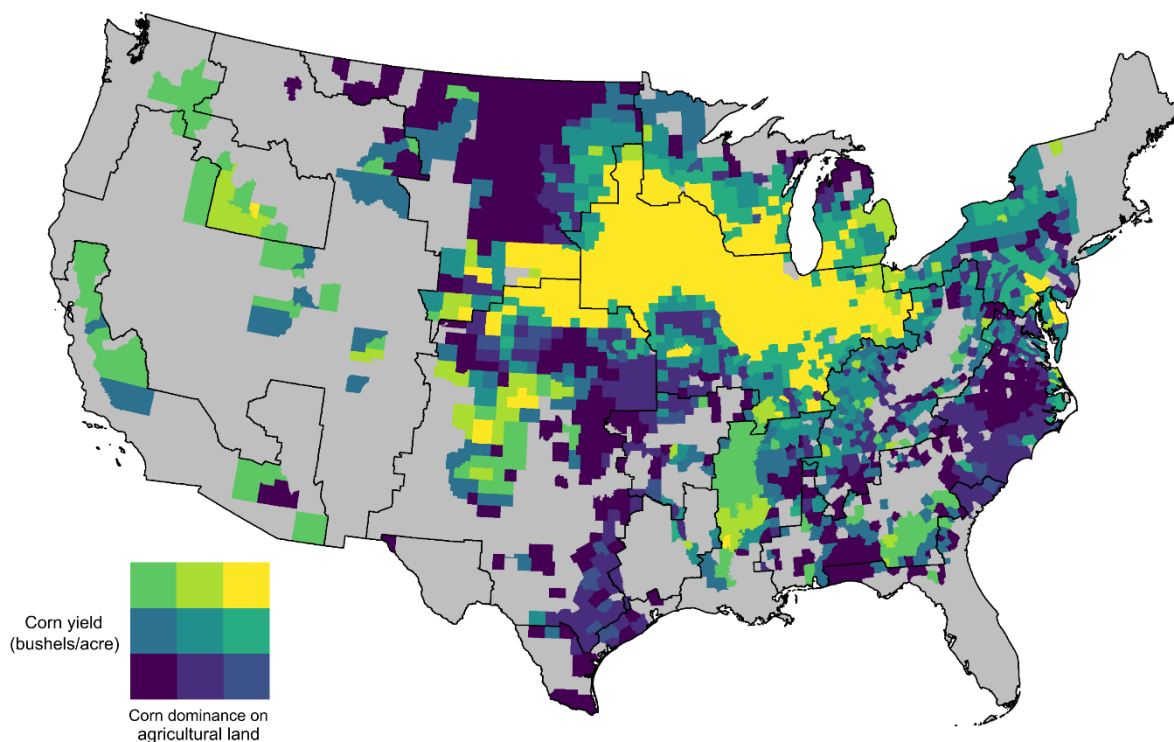

**Figure S12.** Percent irrigated acreage on agricultural lands across study years (2008–2018) faceted by prediction class.

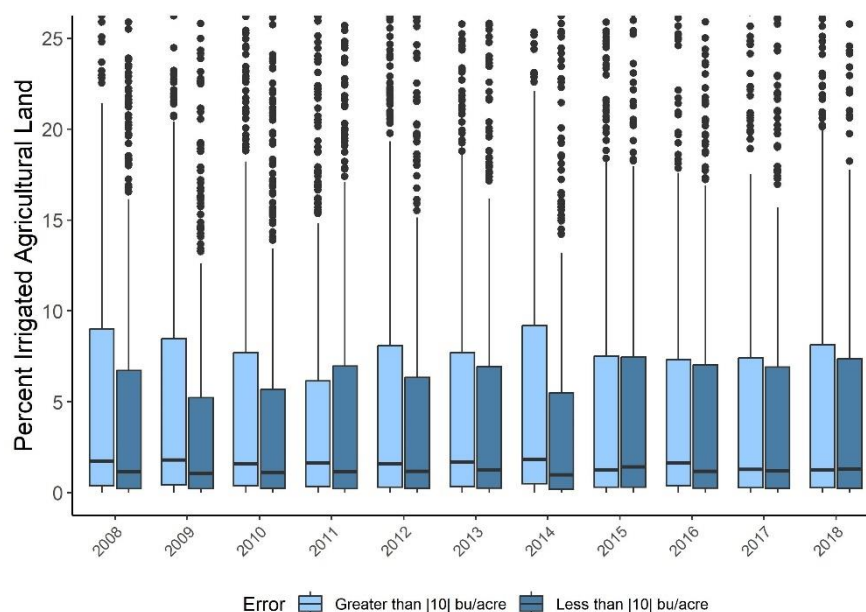

Supplement: s1 [file s1 › agriculture-2206155-supplementary.pdf]
