# Supplementary material for: Leveraging Important Covariate Groups for Corn Yield Prediction
Source: MDPI journal article supplement (doi:10.3390/agriculture13030618), 2023-03-03
Supplement: s1 [file s1]

Archive with 1 entries (1 files):
- agriculture-2206155-supplementary.pdf
